# Supplementary material for: Synthesis of alkenylene-bridged macrocyclic silsesquioxanes by ruthenium or rhodium-catalyzed ring-closing reactions of bis(allyldimethylsilyl) groups
Source: Royal Society of Chemistry journal article supplement (doi:10.1039/b104086n), 2001-01-01
Supplement: b104086n.doc [file b104086n.doc]

**Supporting Information**

**Experimental Details**

**Materials and Methods.**  All manipulations were performed under an argon atmosphere using standard Schlenk techniques. All solvents and triethylamine were distilled under argon over appropriate drying reagents (sodium, sodium / benzophenone, calcium chloride or calcium hydride). Silsesquioxane trisilanol, (*c*-C5H9)7Si7O9(OH)3 (**10**), chlorodimetheylvinylsilane, allylchlorodimetheylsilane, {(C6H11)3P}2Cl2Ru=CHPh (**3**), tetrakis(diethylamino)titanium were obtained commercially and used without further purification. Cp*Rh(ethylene)2 (**9**) was prepared from [Cp*RhCl2]2 according to the method in the literature (K. Moseley, J. W. Kang, and P. M. Maitlis, *J. Chem. Soc*., **1970 A**, 2875). An silsesquioxane disilanol (**2**) was prepared according to known literature procedures (H. C. L Abbenhuis, A. D. Burrows, H. Kooijman, M. Lutz, M. T. Palmer, R. A. van Santen, A. L. Spek, *Chem. Commun*., **1998**, 2627). The detailed synthetic procedure of a titanium-containing silsesquioxane (**6**) was reported elsewhere (K. Wada, K. Yamada, D. Izuhara, T. Kondo, and T. Mitsudo, *Chem. Lett*., **2000**, 1332).

**Physical and Analytical Measurements.** NMR spectra were recorded on either a JEOL AL-300 (FT, 300 MHz (1H) and 75 MHz (13C)) or a JEOL EX-400 (FT, 400 MHz (1H), 100 MHz (13C), and 76 MHz (29Si)) instrument. Chemical shift values () for 1H and 13C are referenced to internal solvent resonances or reported relative to SiMe4. Chemical shift values for 29Si are referenced to external SiMe4 resonance. IR spectra were recorded on a Nicolet Impact 410 FT-IR spectrometer. GC analyses were performed on a Shimadzu GC-8A gas chromatograph with an FID detection and Shimadzu C-R6A recorder/integrator using a (3.0-mm i.d., 3.0 m) column with Porapak-Q in 60 / 80 mesh. Purification of the products was performed on a recycling preparative HPLC (Japan Analytical Industry Co. Ltd., Model LC-918 equipped with a JAIGEL-1H (20 mm i.d., 600 mm) and JAIGEL-2H (20 mm i.d., 600 mm) columns (GPC) with a RI detector. Elemental analyses were performed at the Microanalytical Center of Kyoto University.

**Synthesis of 1a.** To a solution of silsesquioxane disilanol (**2**) (8.53 g, 9.0 mmol) and triethylamine (25 cm3, 180 mmol) in THF (100 cm3), allylchlorodimethylsilane (5.3 cm3, 36.0 mmol) in THF (50 cm3) was added dropwise and it was stirred at room temperature for 18 h. After filtration, resulting pale yellow solution was then evaporated at room temperature to leave a pale yellow solid. This solid was extracted with pentane (100 cm3) to give a clear filtrate, from which the solvent was evaporated. The white product remained was recrystallized by slow diffusion of acetonitrile into a benzene solution. Yield 98%. M.p. 237.0 - 238.0 °C. 1H NMR (300 MHz, CDCl3, 25 °C)  5.81 (ddt, *3J*HH = 17.1, 9.7, 8.1 Hz, 2H, SiCH2C*H*=CH2), 4.88 (d, *3J*HH = 17.1 Hz, 2H, *trans*-SiCH2CH=C*H*2), 4.85 (d, *3J*HH = 9.7 Hz, 2H, *cis*-SiCH2CH=C*H*2), 1.77-1.48 (br m, 60H, C*H*2 of Cy and Si-C*H*2CH=CH2), 0.97-0.87 (br m, 7H, C*H* of Cy), 0.16 (s, 12H, Si(C*H*3)2), 0.15 (s, 9H, Si(C*H*3)3); 13C{1H} NMR (75 MHz, CDCl3, 25 °C)  134.53 (SiCH2*C*H=CH2), 113.24 (SiCH2CH=*C*H2), 27.67, 27.31, 27.06, 26.97, 26.92, (*C*H2 of Cy), 26.21 (Si*C*H2CH=CH2), 24.59, 23.78, 22.51, (3 : 3 : 1 for *C*H of Cy), 1.99 (Si(*C*H3)3), -0.15 (Si(*C*H3)2); 29Si{1H} NMR (76 MHz, CDCl3, 0.02 M Cr(acac)3, 25 °C)  8.45 (*Si*(*C*H3)3), 5.57 (*Si*(*C*H3)2), -66.30, -67.71, -67.81 (1 : 1 : 5). IR spectrum (KBr): 2953, 2867, 2364, 2345, 1254, 1120, 1086, 843, 755, 563, 486 cm-1. Anal. Calcd for C48H94O12Si10 (1144.11): C, 50.39; H, 8.28. Found C, 50.55; H, 8.53.

**Synthesis of 1b.** To a solution of silsesquioxane trisilanol (**10**) (7.00 g, 8.0 mmol) and triethylamine (16.7 cm3, 120 mmol) in THF (70 cm3), allylchlorodimethylsilane (7.0 cm3, 48.0 mmol) in THF (30 cm3) was added dropwise, and the mixture was stirred at room temperature for 18 h. After filtration, resulting pale yellow solution was then evaporated at room temperature to leave a pale yellow solid. This solid was extracted with pentane (100 cm3) to give a clear filtrate, from which the solvent was evaporated. The white product was obtained by recrystallization by slow diffusion of acetonitrile into a benzene solution. Yield 98%. M.p. 220.0 - 221.0 °C; 1H NMR (300 MHz, CDCl3, 25 °C)  5.81 (ddt, *3J*HH = 17.1, 9.7, 8.1 Hz, 3H, SiCH2C*H*=CH2), 4.88 (d, *3J*HH = 17.1 Hz, 3H, *trans*-SiCH2CH=C*H*2), 4.85 (d, *3J*HH = 9.7 Hz, 3H, *cis*-SiCH2CH=C*H*2), 1.77-1.49 (br m, 62H, C*H*2 of Cy and SiC*H*2*C*H=CH2), 1.01-0.87 (br m, 7H, C*H* of Cy), 0.16 (s, 18H, Si(C*H*3)2); 13C{1H} NMR (75 MHz, CDCl3, 25 °C)  134.48 (SiCH2*C*H=CH2), 113.28 (SiCH2CH=*C*H2), 27.70, 27.66, 27.31, 27.06, 26.97, 26.91 (*C*H2 of Cy), 26.19 (Si*C*H2CH=CH2), 24.58, 23.79, 22.50 (3 : 3 : 1 for *C*H of Cy), -0.15 (Si(*C*H3)2); 29Si{1H} NMR (76 MHz, CDCl3, 0.02 M Cr(acac)3, 25 °C)  5.62 (*Si*(CH3)2), -66.28, -67.68 (1 : 6). IR spectrum (KBr): 3453, 2952, 2866, 1255, 1118, 952, 911, 833, 785, 489 cm-1. Anal. Calcd for C50H96O12Si10 (1170.15): C, 51.32; H, 8.27. Found C, 51.60; H, 8.54.

**Synthesis of 4a.** The ruthenium benzylidene catalyst {(C6H11)3P}2Cl2Ru=CHPh (**3**) (0.082 g, 0.1 mmol) and **1a** (2.29 g, 2.0 mmol) in C2H4Cl2 (50 cm3) was stirred at 65 °C. After 18 h stirring, 0.082 g (0.1 mmol) of **3** was added. After stirring for further 18 h,0.049 g, (0.06 mmol) of **3** was added and stirred additionally for 18 h. The product was then chromatographed on alumina. Eluted with pentane, resulting clear solution was then evaporated at room temperature to leave a white solid. The product was obtained by the recrystallization by slow diffusion of acetonitrile into a benzene solution. Yield 94% (*cis* : *trans* = 4.9 : 1). M.p. 239.0 - 242.0 °C. IR spectrum (KBr): 2952, 2865, 1451, 1252, 1119, 1059, 912, 859, 842, 755, 490 cm-1. Anal. Calcd for C46H90O12Si10 (1116.05): C, 49.50; H, 8.13. Found C, 49.28; H, 8.16. NMR data for *cis*-**4a**; 1H NMR (300 MHz, CDCl3, 25 °C)  5.35 (t, *3J*HH = 5.6 Hz, 2H, Si-CH2-C*H*=C*H*-CH2-Si), 1.75-1.47 (br m, 60H, C*H*2 of Cy and Si-C*H*2-CH=CH-C*H*2-Si), 0.99-0.89 (br m, 7H, C*H* of Cy), 0.14 (s, 6H, Si(C*H*3)2), 0.13 (s, 9H, Si(C*H*3)3), 0.10 (s, 6H, Si(C*H*3)2); 13C{1H} NMR (75 MHz, CDCl3, 25 °C)  122.97 (Si-CH2-*C*H=*C*H-CH2-Si), 27.63, 27.58, 27.53, 27.29, 27.10, 26.99, 26.95, 26.92 (*C*H2 of Cy), 24.89, 24.21, 23.80, 23.51, 22.45 (1 : 2 : 2 : 1 : 1 for *C*H of Cy), 19.63 (Si-*C*H2-CH=CH-*C*H2-Si), 1.99 (Si(*C*H3)3), 0.23 (Si(*C*H3)2), 0.11 (Si(*C*H3)2); 29Si{1H} NMR (76 MHz, CDCl3, 0.02 M Cr(acac)3, 25 °C)  8.10 (*Si*(CH3)3), 6.63 (*Si*(CH3)2), -66.28, -67.68, -67.81, -67.98, -68.37 (1 : 1 : 2 : 2 : 1). NMR data for *trans*-**4a**; 1H NMR (300 MHz, CDCl3, 25 °C)  5.40 (br s, 2H, Si-CH2-C*H*=C*H*-CH2-Si); 13C{1H} NMR (75 MHz, CDCl3, 25 °C)  124.11 (Si-CH2-*C*H=*C*H-CH2-Si); 29Si{1H} NMR (76 MHz, CDCl3, 0.02 M Cr(acac)3, 25 °C)  5.91 (*Si*(CH3)2). Other peaks of *trans*-**4a** were not fully confirmed because of severe overlapping with those of *cis*-**4a**.

**Synthesis of 4b.** A mixture of the ruthenium catalyst (**3**) (0.082 g, 0.10 mmol) and **1b** (2.29 g, 2.0 mmol) in ClCH2CH2Cl (50 cm3) was stirred at 65 °C. After 18 h stirring, 0.082 g (0.10 mmol) of **3** was added and stirred additionally for 18 h. The product was then chromatographed on alumina. A eluted clear solution with pentane was then evaporated at room temperature to leave a white solid. The product was obtained by recrystallization by slow diffusion of acetonitrile into a benzene solution. Yield 90% (*cis* : *trans* = 5.6 : 1). M.p. 226.0 – 228.5 °C. IR spectrum (KBr): 2952, 2865, 2360, 2342, 1457, 1451, 1390, 1252, 1117, 1061, 916, 842, 759, 568, 493 cm-1. Anal. Calcd for C48H92O12Si10 (1142.09): C, 50.48; H, 8.12. Found C, 50.20; H, 7.87. NMR data for *cis*-**4b**; 1H NMR (300 MHz, CDCl3, 25 °C)  5.81 (ddt, *3J*HH = 17.1, 9.7, 8.1 Hz, 1H, Si-CH2-C*H*=CH2), 5.37 (t, *3J*HH = 5.2 Hz, 2H, Si-CH2-C*H*=C*H*-CH2-Si), 4.88 (d, *3J*HH = 17.1 Hz, 1H, *trans*-Si-CH2-CH=C*H*2), 4.84 (d, *3J*HH = 9.7 Hz, 1H, *cis*-Si-CH2-CH=C*H*2), 1.77-1.49 (br m, 62H, C*H*2 of Cy, Si-C*H*2-CH=CH2 and Si-C*H*2-CH=CH-C*H*2-Si), 1.01-0.91 (br m, 7H, C*H* of Cy), 0.16 (s, 12H, Si(C*H*3)2), 0.12 (s, 6H, Si(C*H*3)2CH2CH=CH2); 13C{1H} NMR (75 MHz, CDCl3, 25 °C)  134.52 (Si-CH2-*C*H=CH2), 123.03 (Si-CH2-*C*H=*C*H-CH2-Si), 113.29 (Si-CH2-CH=*C*H2), 27.80, 27.71, 27.67, 27.63, 27.58, 27.34, 27.14, 27.03, 26.99, 26.96 (*C*H2 of Cy), 26.23 (Si-*C*H2-CH=CH2), 24.91, 24.29, 23.87, 23.58, 22.52 (1 : 2 : 2 : 1 : 1 for *C*H of Cy), 19.66 (Si-*C*H2-CH=CH-*C*H2-Si), 0.28, 0.11, -0.18 (Si(*C*H3)2); 29Si{1H} NMR (76 MHz, CDCl3, 0.02 M Cr(acac)3, 25 °C)  6.72 (*Si*-CH2-CH=CH-CH2-*Si*), 5.30 (*Si*(CH3)2) -66.21, -67.61, -67.66, -67.88, -68.25 (1 : 1 : 2 : 2 : 1). NMR data for *trans*-**4b**; 1H NMR (300 MHz, CDCl3, 25 °C)  5.41 (br s, 2H, Si-CH2-C*H*=C*H*-CH2-Si); 13C{1H} NMR (75 MHz, CDCl3, 25 °C)  124.14 (Si-CH2-*C*H=*C*H-CH2-Si); 29Si{1H} NMR (76 MHz, CDCl3, 0.02 M Cr(acac)3, 25 °C)  6.01 (*Si*-CH2-CH=CH-CH2-*Si*), 5.62 (*Si*(CH3)2. Other peaks of *trans*-**4b** were not fully confirmed because of severe overlapping with those of *cis*-**4b**.

**Synthesis of 7.**  A mixture of the ruthenium catalyst (**3**) (0.0082 g, 0.010 mmol) and **6** (0.40 g, 0.20 mmol) in ClCH2CH2Cl (15 cm3) was stirred at 65 °C, and after 18 h and 36 h, **3** (0.0 82 g, 0.010 mmol) was added twice. The mixture was stirred for total 54 h, and then the solvent was evaporated at room temperature to leave a blown solid. This solid was extracted with acetone (20 cm3) to give a white solid, which was dried under vacuum. The product was obtained by recrystallization by slow diffusion of acetonitrile into a benzene solution. Yield 74% (*cis* : *trans* = 4.4 : 1). M.p. over 300.0 °C. IR spectrum (KBr): 2951, 2866, 1450, 1250, 1115, 907, 842, 494 cm-1. Anal. Calcd for C78H144O24Si16Ti (1963.20): C, 47.72; H, 7.39. Found C, 47.44; H, 7.15. NMR data for *cis*-**7**; 1H NMR (300 MHz, CDCl3, 25 °C) 5.29 (t, *3J*HH = 5.8 Hz, 2H, Si-CH2-C*H*=C*H*-CH2-Si), 1.89-1.47 (br m, 60H, C*H*2 of Cy and Si-C*H*2-CH=CH-C*H*2-Si), 0.98-0.89 (br m, 7H, C*H* of Cy), 0.15 (s, 6H, Si(C*H*3)2), 0.08 (s, 6H, Si(C*H*3)2); 13C{1H} NMR (75 MHz, CDCl3, 25 °C)  122.96 (Si-CH2-*C*H=*C*H-CH2-Si), 27.71, 27.46, 27.32, 27.06, 26.95 (CH2 of Cy), 24.39, 23.42, 23.20, 23.00, 22.86, 22.37, 22.28 (for *C*H of Cy), 19.05 (Si-*C*H2-CH=CH-*C*H2-Si) -0.04 (Si(*C*H3)2), -0.19 (Si(*C*H3)2); 29Si{1H} NMR (76 MHz, CDCl3, 0.02 M Cr(acac)3, 25 °C)  6.77 (*Si*(CH3)2), -65.29, -65.89, -66.35, -67.14, -67.95, -68.03, -68.50 (1 : 1 : 1 : 1 : 1 : 2). NMR data for *trans*-**7**; 1H NMR (300 MHz, CDCl3, 25 °C)  5.33 (br s, Si-CH2-C*H*=C*H*-CH2-Si); 13C{1H} NMR (75 MHz, CDCl3, 25 °C)  124.09 (Si-CH2-*C*H=*C*H-CH2-Si); 29Si{1H} NMR (76 MHz, CDCl3, 0.02 M Cr(acac)3, 25 °C)  6.89 (*Si*(CH3)2). Other peaks of *trans*-**7** were not fully confirmed because of severe overlapping with those of *cis*-**7**.

**Synthesis of 8a.**  A mixture of rhodium complex, Cp*Rh(ethylene)2 (**9**) (0.029 g, 0.10 mmol), and **1a** (1.14 g, 1.0 mmol) in EtOH (50 cm3) was stirred under reflux for 18 h, then chromatographed on Florisil. A eluted clear solution with pentane was then evaporated at room temperature to leave a white solid. The product was obtained by recrystallization by slow diffusion of acetonitrile into a benzene solution. Yield 80%. M.p. 245.0 – 247.0 °C. 1H NMR (300 MHz, CDCl3, 25 °C)  6.36 (dt, *3J*HH = 18.4, 7.5 Hz, 1H, Si-CH2-C*H*=CH-Si), 5.44 (d, *3J*HH = 18.4 Hz, 1H, Si-CH2-CH=C*H*-Si), 1.92 (d, *3J*HH = 7.5 Hz, 1H, Si-C*H*2-CH=CH-Si), 1.88 (d, *3J*HH = 7.5 Hz, 1H, Si-C*H*2-CH=CH-Si), 1.74-1.47 (br m, 56H, C*H*2 of Cy), 0.96-0.88 (br m, 7H, C*H* of Cy), 0.13 (s, 3H, Si(C*H*3)2), 0.12 (s, 3H, Si(C*H*3)2), 0.10 (s, 9H, Si(C*H*3)3), 0.08 (s, 3H, Si(C*H*3)2), 0.07 (s, 3H, Si(C*H*3)2), 13C{1H} NMR (75 MHz, CDCl3, 25 °C)  144.40 (Si-CH2-*C*H=CH-Si), 127.28 (Si-CH2-CH=*C*H-Si), 27.72, 27.65, 27.58, 27.30, 27.19, 27.12, 27.03, 26.98, 26.96 (*C*H2 of Cy and Si-*C*H2-CH=CH-Si), 24.86, 24.19, 23.99, 23.81, 22.69, 23.31, 24.42 (*C*H of Cy), 1.89 (Si(*C*H3)3), 1.27 (Si(*C*H3)2), 1.10 (Si(*C*H3)2), 0.61 (Si(*C*H3)2), -0.64 (Si(*C*H3)2); 29Si{1H} NMR (76 MHz, CDCl3, 0.02 M Cr(acac)3, 25 °C)  8.10 (*Si*(CH3)3), 5.00 (*Si*-CH2-CH=CH-Si), -4.04 (Si-CH2-CH=CH-*Si*) -66.16, -67.68, -67.73, -68.05, -68.32, -68.50, -68.72 (1 : 1 : 1 : 1 : 1 : 1 : 1). IR spectrum (KBr): 2951, 2865, 1451, 1252, 1120, 1061, 861, 841, 563, 491 cm-1. Anal. Calcd for C45H88O12Si10 (1102.03): C, 49.04; H, 8.05. Found C, 48.98; H, 8.04.
